# Supplementary material for: Fractal analysis of geomagnetic data to decipher pre-earthquake process in Andaman-Nicobar region, India
Source: Copernicus journal article supplement (doi:10.5194/npg-2024-8), 2024-04-29
Supplement: Supplementary file 1 [file npg-2024-8-supplement.pdf]

## Supplementary materials

**Figure S1.** The temporal variation for March-2019 of components monofractal analysis (a) Higuchi fractal dimension, and multifractal analysis (b) spectrum width component, (c)  $f_{max}$  component, (d)  $h_{max}$  components. Panel (e) and (f) showing the diurnal ratio component and occurrences of earthquakes in same time duration with magnitude and focal depth respectively. The significant enhancements from each component are shaded by green color.

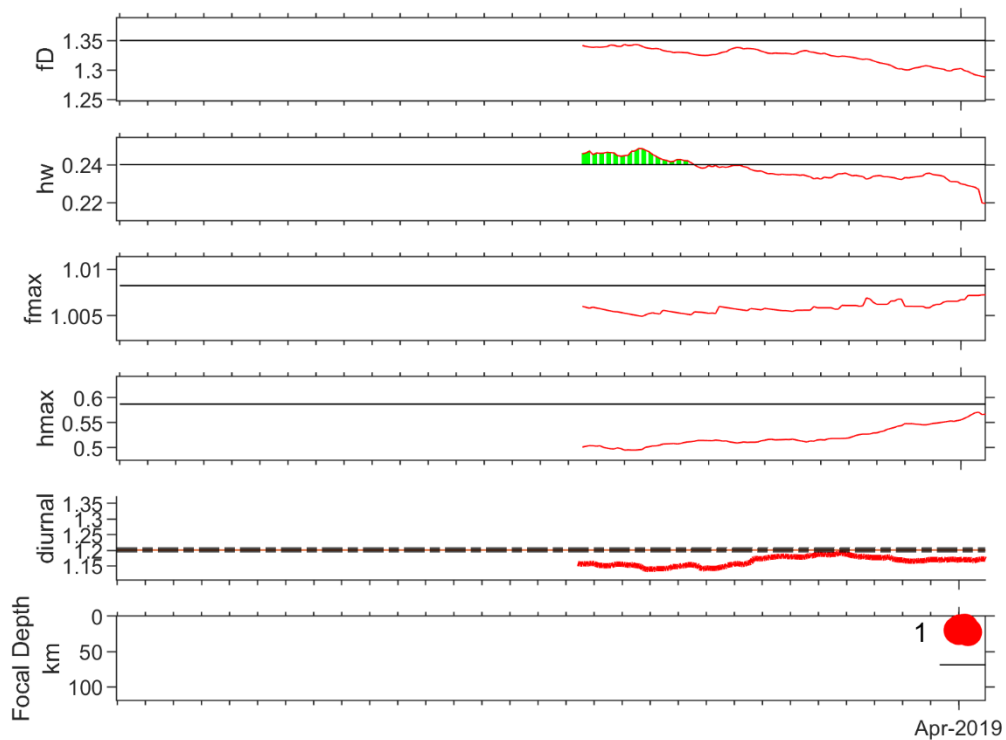

**Figure S2.** The temporal variation for April-2019 of components monofractal analysis (a) Higuchi fractal dimension, and multifractal analysis (b) spectrum width component, (c) fmax component, (d) hmax components. Panel (e) and (f) showing the diurnal ratio component and occurrences of earthquakes in same time duration with magnitude and focal depth respectively. The significant enhancements from each component are shaded by green color.

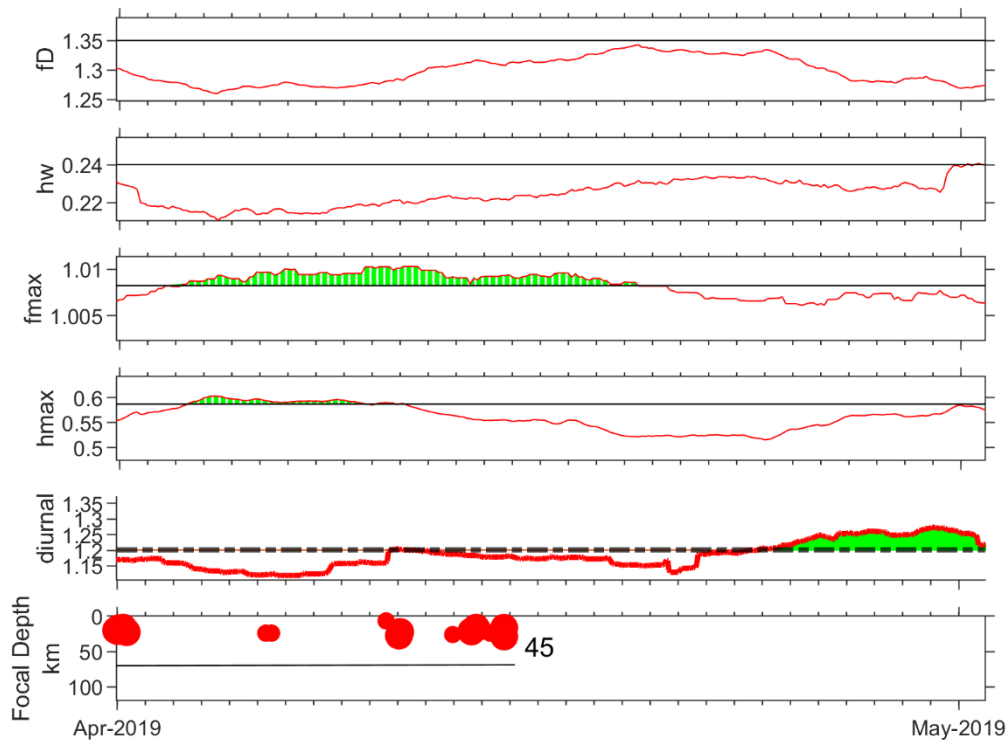

**Figure S3.** The temporal variation for May-2019 of components monofractal analysis (a) Higuchi fractal dimension, and multifractal analysis (b) spectrum width component, (c) fmax component, (d) hmax components. Panel (e) and (f) showing the diurnal ratio component and occurrences of earthquakes in same time duration with magnitude and focal depth respectively. The significant enhancements from each component are shaded by green color.

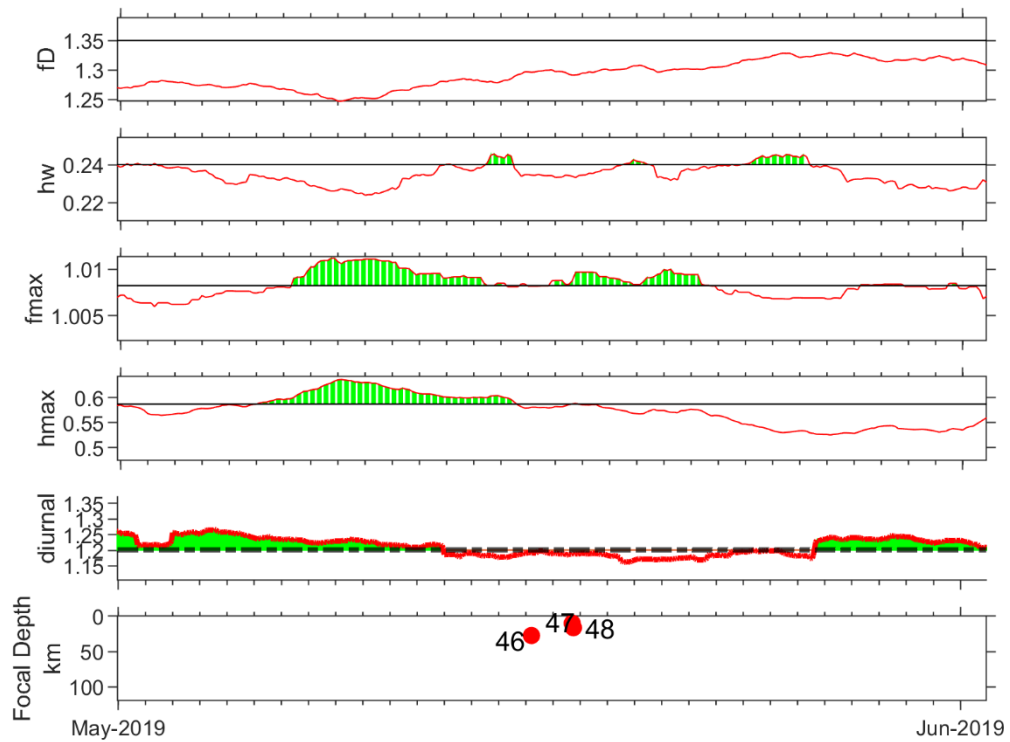

**Figure S4.** The temporal variation for Jun-2019 of components monofractal analysis (a) Higuchi fractal dimension, and multifractal analysis (b) spectrum width component, (c) fmax component, (d) hmax components. Panel (e) and (f) showing the diurnal ratio component and occurrences of earthquakes in same time duration with magnitude and focal depth respectively. The significant enhancements from each component are shaded by green color.

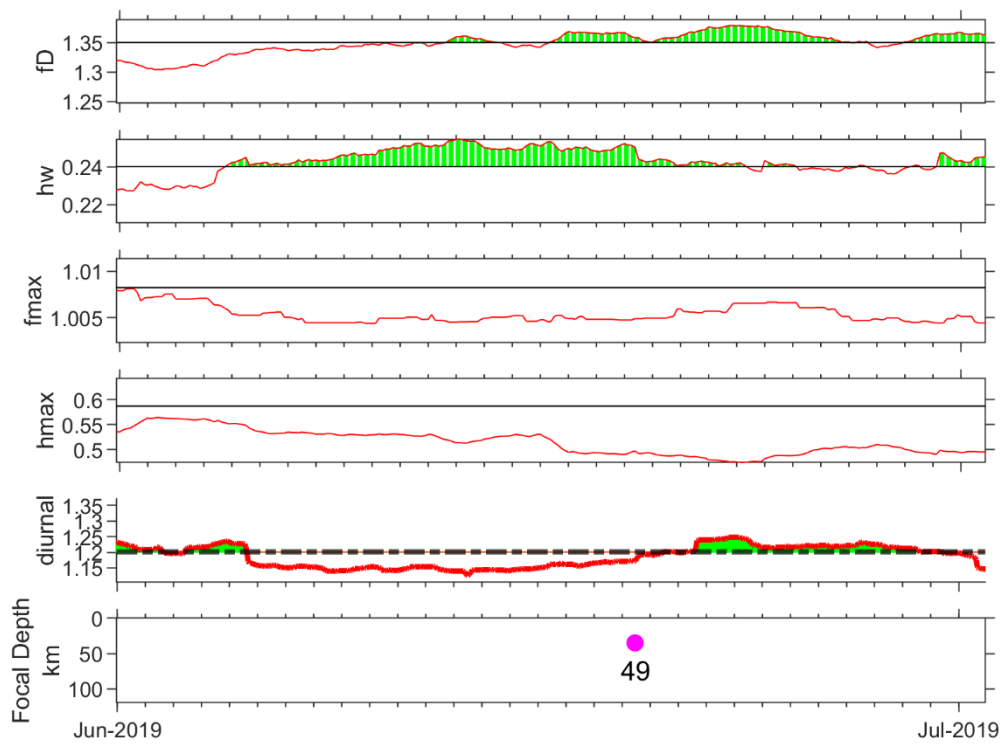

**Figure S5.** The temporal variation for Jul-2019 of components monofractal analysis (a) Higuchi fractal dimension, and multifractal analysis (b) spectrum width component, (c) fmax component, (d) hmax components. Panel (e) and (f) showing the diurnal ratio component and occurrences of earthquakes in same time duration with magnitude and focal depth respectively. The significant enhancements from each component are shaded by green color.

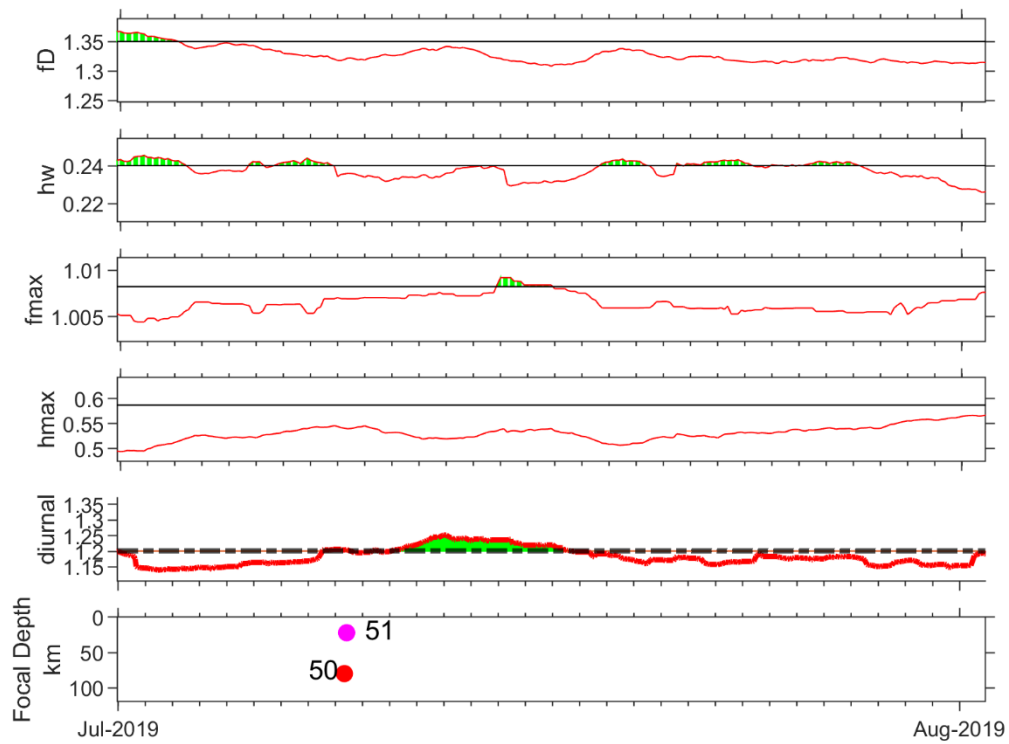

**Figure S6.** The temporal variation for Aug-2019 of components monofractal analysis (a) Higuchi fractal dimension, and multifractal analysis (b) spectrum width component, (c) fmax component, (d) hmax components. Panel (e) and (f) showing the diurnal ratio component and occurrences of earthquakes in same time duration with magnitude and focal depth respectively. The significant enhancements from each component are shaded by green color.

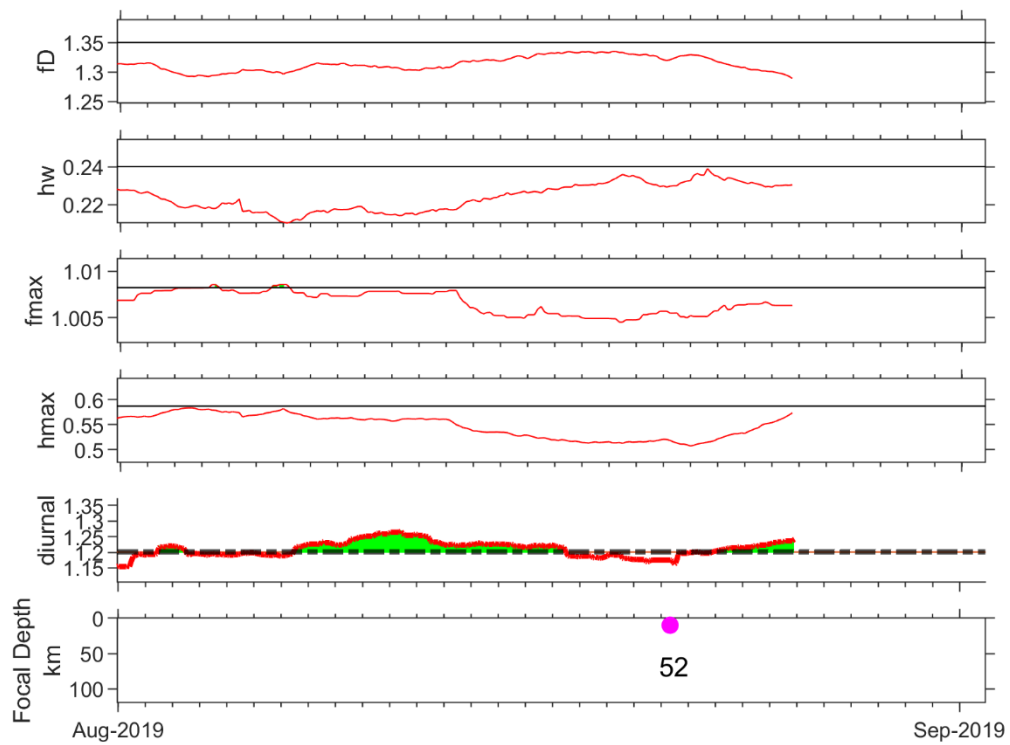

**Figure S7.** The temporal variation for Sep-2019 of components monofractal analysis (a) Higuchi fractal dimension, and multifractal analysis (b) spectrum width component, (c) fmax component, (d) hmax components. Panel (e) and (f) showing the diurnal ratio component and occurrences of earthquakes in same time duration with magnitude and focal depth respectively. The significant enhancements from each component are shaded by green color.

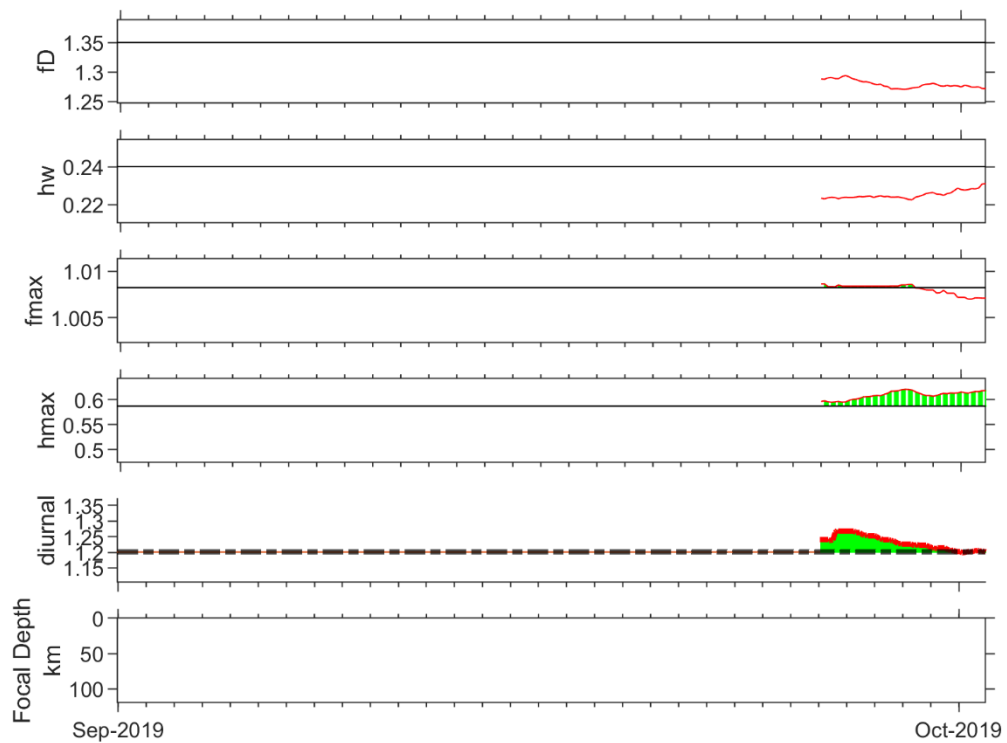

**Figure S8.** The temporal variation for Oct-2019 of components monofractal analysis (a) Higuchi fractal dimension, and multifractal analysis (b) spectrum width component, (c) fmax component, (d) hmax components. Panel (e) and (f) showing the diurnal ratio component and occurrences of earthquakes in same time duration with magnitude and focal depth respectively. The significant enhancements from each component are shaded by green color.

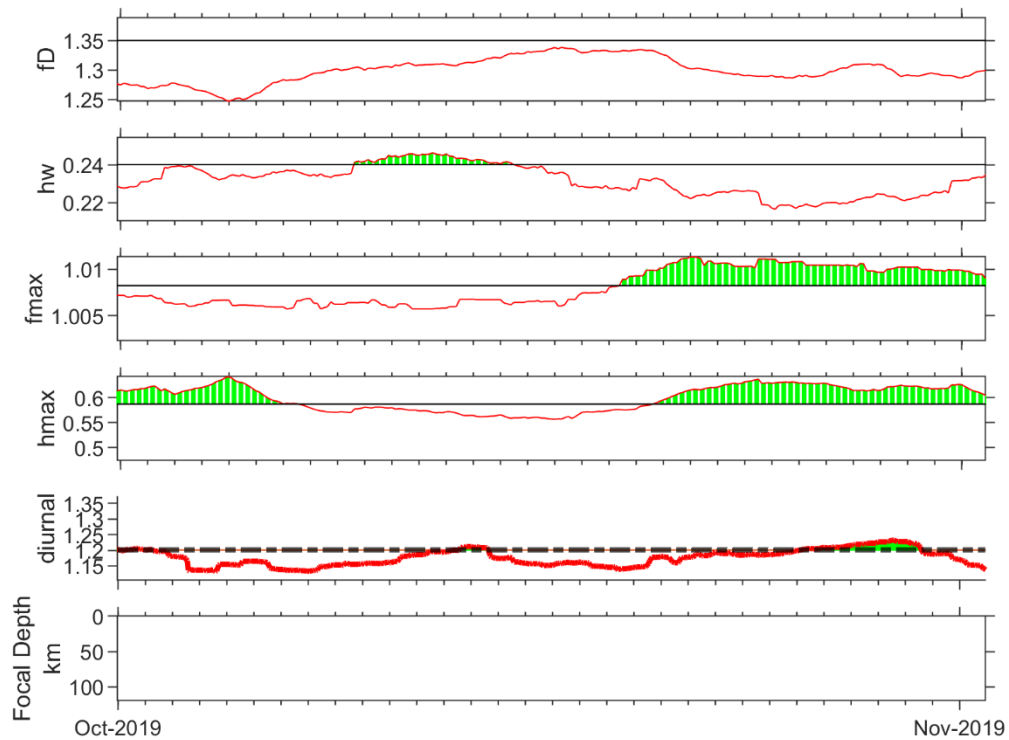



**Figure S9.** The temporal variation for Nov-2019 of components monofractal analysis (a) Higuchi fractal dimension, and multifractal analysis (b) spectrum width component, (c) fmax component, (d) hmax components. Panel (e) and (f) showing the diurnal ratio component and occurrences of earthquakes in same time duration with magnitude and focal depth respectively. The significant enhancements from each component are shaded by green color.

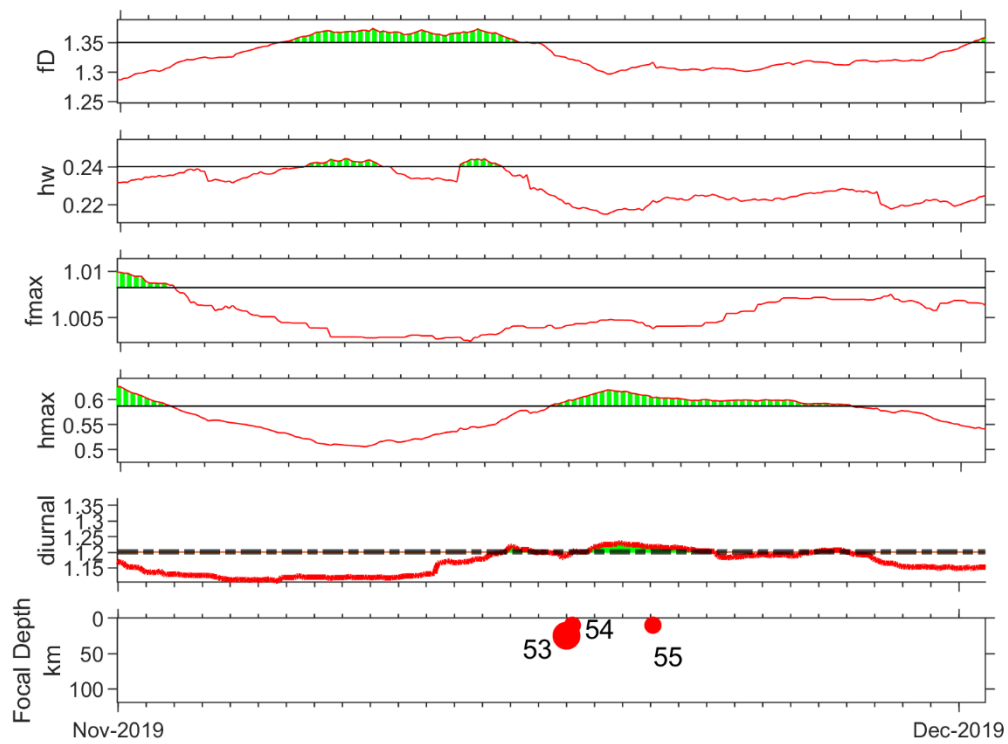

**Figure S10.** The temporal variation for Dec-2019 of components monofractal analysis (a) Higuchi fractal dimension, and multifractal analysis (b) spectrum width component, (c) fmax component, (d) hmax components. Panel (e) and (f) showing the diurnal ratio component and occurrences of earthquakes in same time duration with magnitude and focal depth respectively. The significant enhancements from each component are shaded by green color.

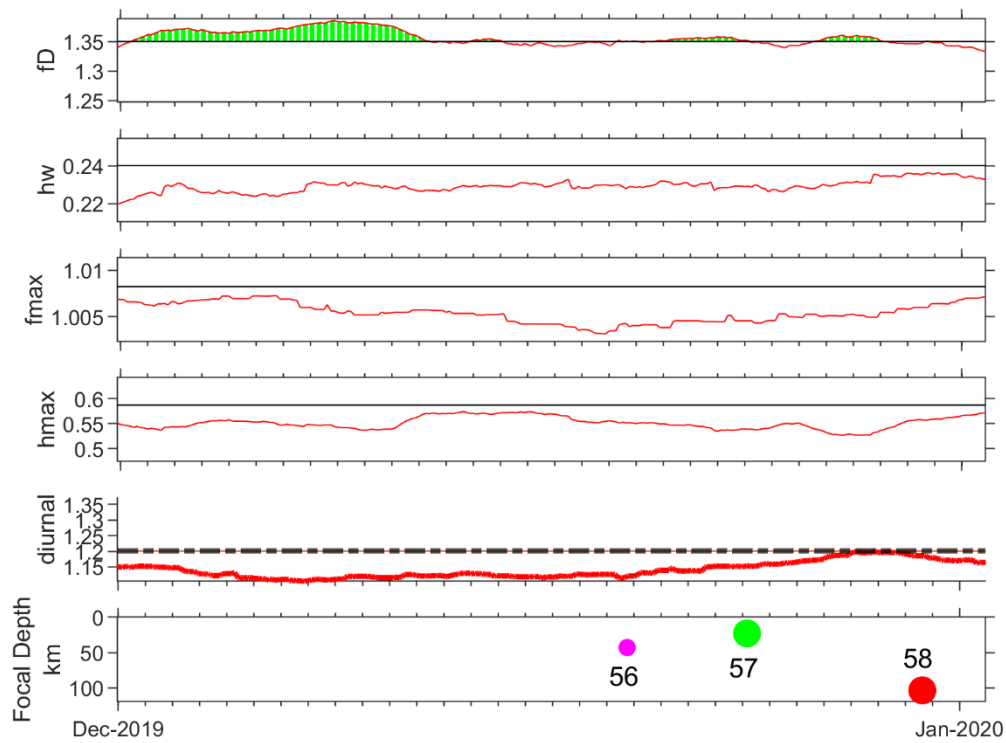

**Figure S11.** The temporal variation for Jan-2020 of components monofractal analysis (a) Higuchi fractal dimension, and multifractal analysis (b) spectrum width component, (c) fmax component, (d) hmax components. Panel (e) and (f) showing the diurnal ratio component and occurrences of earthquakes in same time duration with magnitude and focal depth respectively. The significant enhancements from each component are shaded by green color.

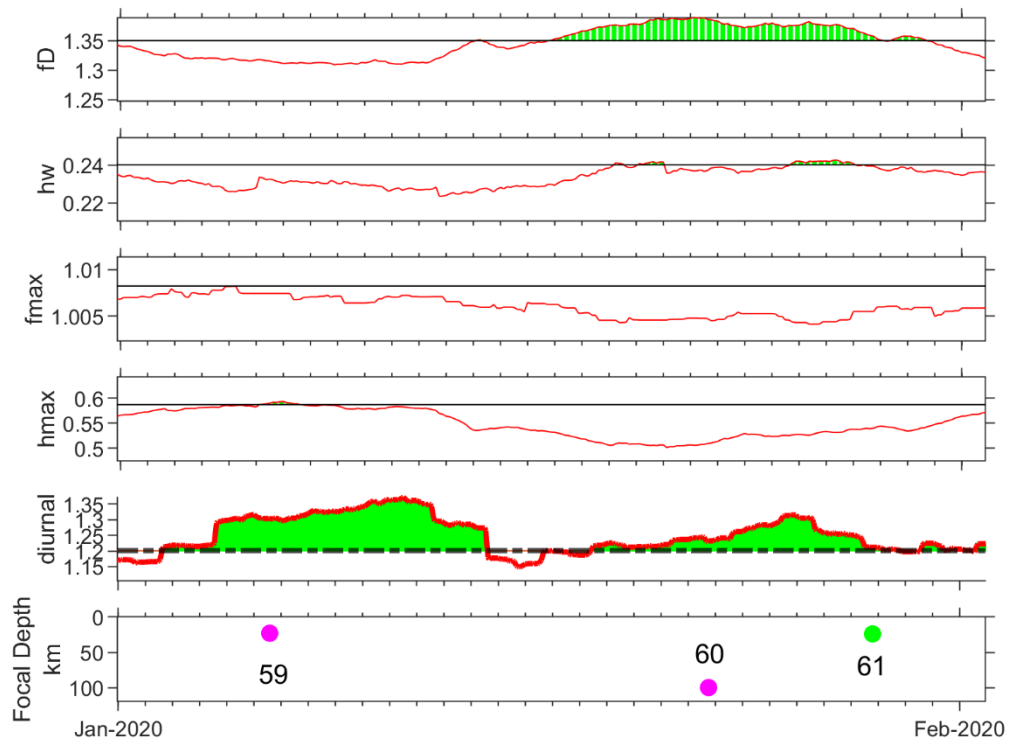

**Figure S12.** The temporal variation for Feb-2020 of components monofractal analysis (a) Higuchi fractal dimension, and multifractal analysis (b) spectrum width component, (c) fmax component, (d) hmax components. Panel (e) and (f) showing the diurnal ratio component and occurrences of earthquakes in same time duration with magnitude and focal depth respectively. The significant enhancements from each component are shaded by green color.

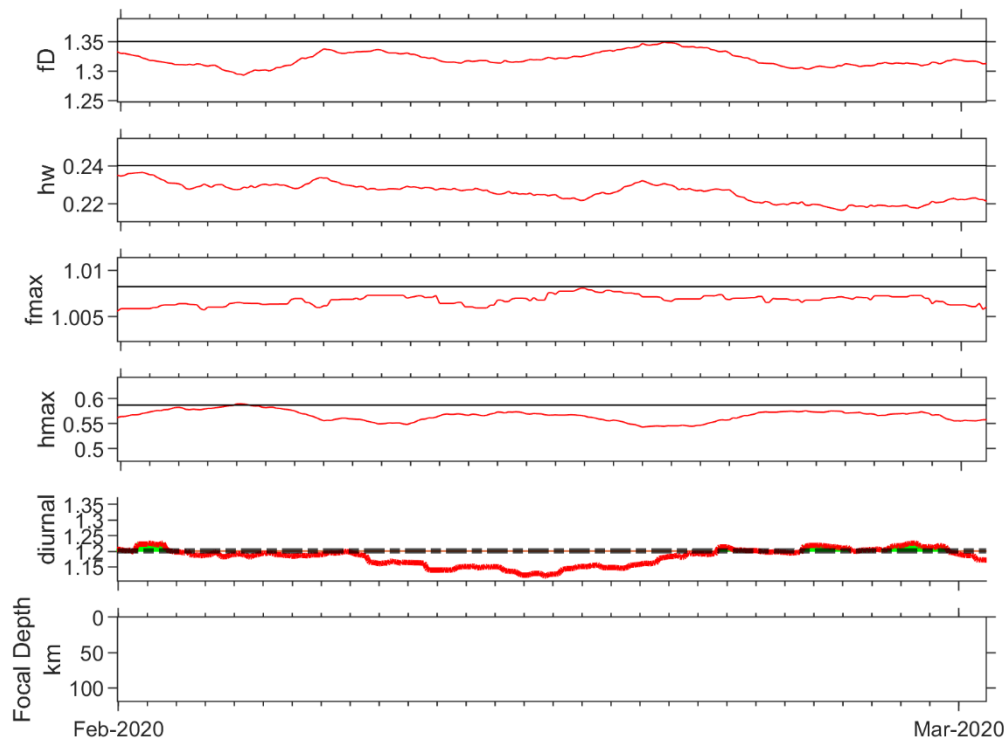

**Figure S13.** The temporal variation for Mar-2020 of components monofractal analysis (a) Higuchi fractal dimension, and multifractal analysis (b) spectrum width component, (c) fmax component, (d) hmax components. Panel (e) and (f) showing the diurnal ratio component and occurrences of earthquakes in same time duration with magnitude and focal depth respectively. The significant enhancements from each component are shaded by green color.

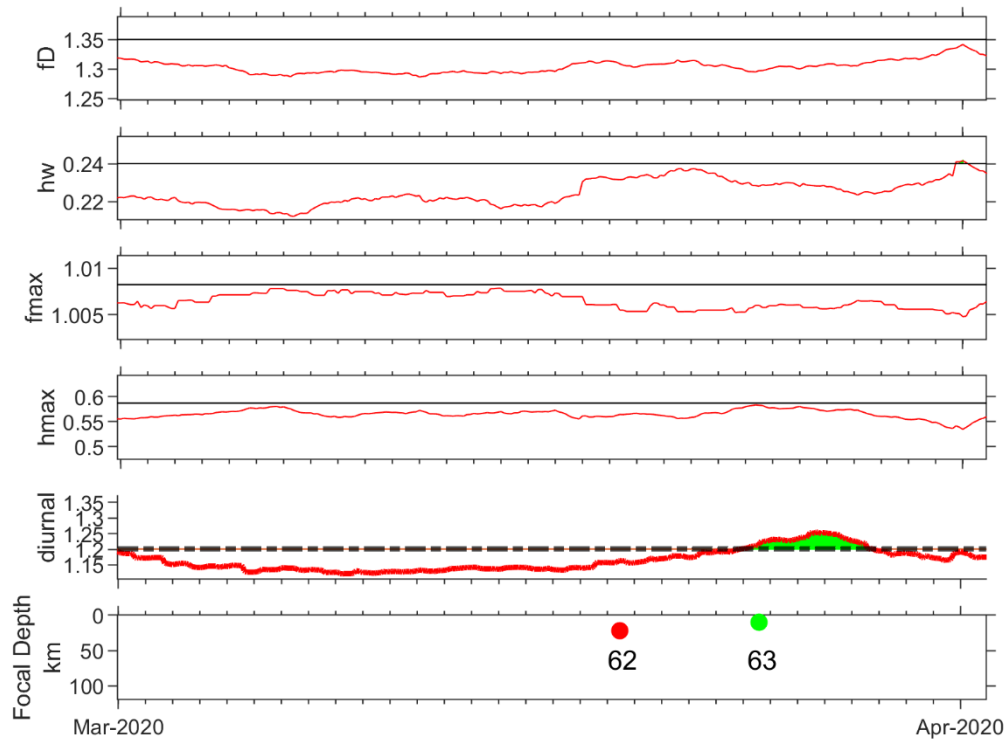

**Figure S14.** The temporal variation for Apr-2020 of components monofractal analysis (a) Higuchi fractal dimension, and multifractal analysis (b) spectrum width component, (c) fmax component, (d) hmax components. Panel (e) and (f) showing the diurnal ratio component and occurrences of earthquakes in same time duration with magnitude and focal depth respectively. The significant enhancements from each component are shaded by green color.

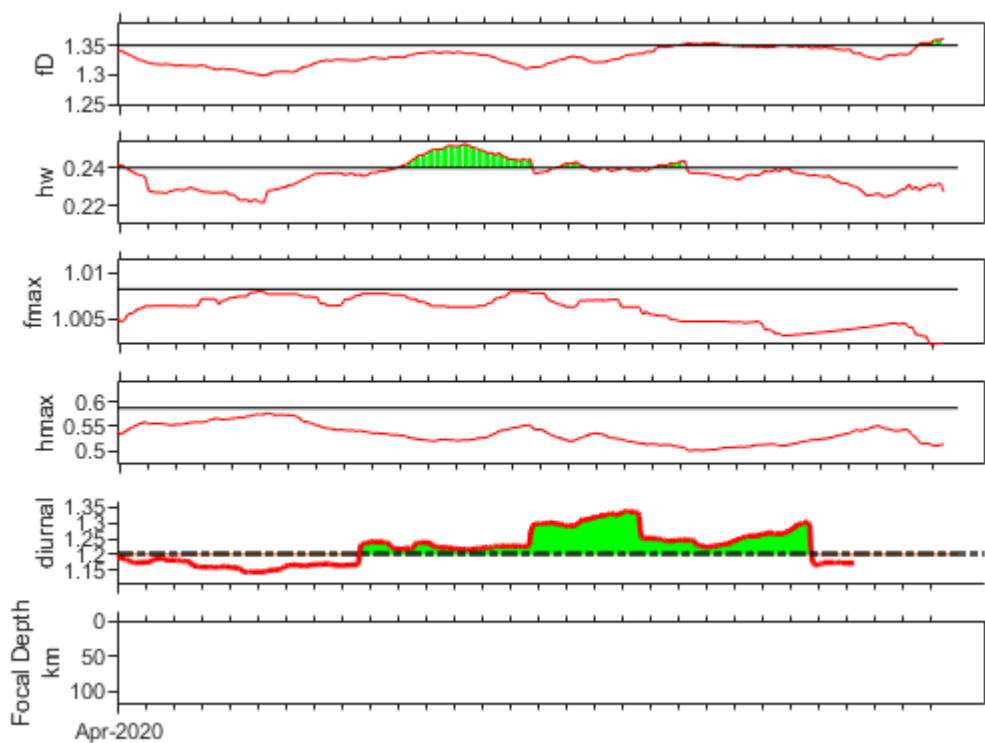

**Table T1.** List of earthquakes with time of occurrence, location, focal depth, and magnitude.

| S.I. | DATE       | TIME     | Epicentre      | Focal-Depth (km) | MAG (Mb) |
|------|------------|----------|----------------|------------------|----------|
| 1    | 31-03-2019 | 23:42:32 | 7.6996,94.2492 | 20               | 4.7      |
| 2    | 31-03-2019 | 23:44:43 | 7.5909,94.1253 | 13               | 4.9      |
| 3    | 31-03-2019 | 23:46:42 | 7.6686,94.1727 | 20               | 5.1      |
| 4    | 31-03-2019 | 23:48:58 | 7.5608,94.1282 | 20               | 4.6      |
| 5    | 31-03-2019 | 23:56:45 | 7.541,94.3568  | 24               | 4.8      |
| 6    | 31-03-2019 | 23:59:48 | 7.7878,94.4918 | 24               | 4.7      |
| 7    | 01-04-2019 | 00:03:44 | 7.6917,94.2339 | 20.9             | 5        |
| 8    | 01-04-2019 | 00:23:39 | 7.6193,94.259  | 24               | 4.7      |
| 9    | 01-04-2019 | 00:25:45 | 7.5951,94.2425 | 23.7             | 4.9      |
| 10   | 01-04-2019 | 00:34:10 | 7.5698,94.3452 | 24               | 4.6      |
| 11   | 01-04-2019 | 00:37:29 | 7.4526,94.2756 | 24               | 4.8      |
| 12   | 01-04-2019 | 00:44:27 | 7.5388,94.3337 | 24               | 4.7      |
| 13   | 01-04-2019 | 00:49:39 | 7.5407,94.1947 | 20               | 4.9      |
| 14   | 01-04-2019 | 00:58:20 | 7.4883,94.219  | 20               | 4.8      |
| 15   | 01-04-2019 | 01:08:08 | 7.5659,94.2647 | 24               | 4.7      |
| 16   | 01-04-2019 | 01:11:44 | 7.5249,94.3343 | 16.9             | 4.9      |
| 17   | 01-04-2019 | 01:21:32 | 7.6171,94.1999 | 20               | 4.7      |
| 18   | 01-04-2019 | 01:22:49 | 7.3636,94.2171 | 20               | 4.6      |
| 19   | 01-04-2019 | 01:23:59 | 7.5703,94.1277 | 17.3             | 5.1      |
| 20   | 01-04-2019 | 01:34:21 | 7.614,94.3289  | 24               | 4.5      |
| 21   | 01-04-2019 | 02:28:05 | 7.728,94.2903  | 10               | 4.6      |
| 22   | 01-04-2019 | 02:46:50 | 7.533,94.2648  | 24               | 4.5      |
| 23   | 01-04-2019 | 02:49:43 | 7.402,94.164   | 20               | 4.5      |
| 24   | 01-04-2019 | 03:21:41 | 7.4521,94.2288 | 20               | 4.5      |
| 25   | 01-04-2019 | 03:38:09 | 7.4656,94.2122 | 20               | 4.8      |
| 26   | 01-04-2019 | 04:09:16 | 7.4718,94.2433 | 20               | 4.8      |
| 27   | 01-04-2019 | 05:09:18 | 7.5492,94.2107 | 20               | 4.8      |
| 28   | 01-04-2019 | 05:52:39 | 7.463,94.2283  | 16.3             | 5        |
| 29   | 01-04-2019 | 06:56:42 | 7.6223,94.2961 | 24               | 4.5      |

|    |            |          |                |       |     |
|----|------------|----------|----------------|-------|-----|
| 30 | 01-04-2019 | 07:37:52 | 7.4665,94.2506 | 28.1  | 4.8 |
| 31 | 01-04-2019 | 08:11:34 | 7.5566,94.1453 | 22.6  | 5.3 |
| 32 | 01-04-2019 | 10:14:06 | 7.4182,94.2619 | 24    | 4.5 |
| 33 | 06-04-2019 | 08:12:47 | 7.3892,94.3412 | 24    | 4.5 |
| 34 | 06-04-2019 | 13:23:07 | 7.3815,94.4192 | 24    | 4.5 |
| 35 | 10-04-2019 | 15:09:33 | 7.5339,94.1907 | 6.6   | 4.5 |
| 36 | 11-04-2019 | 02:39:32 | 7.6655,94.2167 | 27.4  | 5   |
| 37 | 11-04-2019 | 03:50:40 | 7.5952,94.1612 | 22.4  | 5.1 |
| 38 | 11-04-2019 | 03:55:15 | 7.5914,94.1947 | 18.8  | 4.8 |
| 39 | 12-04-2019 | 23:14:03 | 7.2498,94.3414 | 26    | 4.6 |
| 40 | 13-04-2019 | 16:12:57 | 7.3145,94.3829 | 21.6  | 5.3 |
| 41 | 13-04-2019 | 16:20:18 | 7.2623,94.3904 | 24    | 4.7 |
| 42 | 13-04-2019 | 20:43:31 | 7.262,94.3367  | 16.4  | 5   |
| 43 | 14-04-2019 | 08:12:09 | 7.3932,94.3761 | 24    | 4.6 |
| 44 | 18-04-2019 | 21:52:11 | 7.5409,94.2677 | 16.5  | 5   |
| 45 | 18-04-2019 | 21:57:58 | 7.5612,94.2611 | 28.7  | 5   |
| 46 | 16-05-2019 | 06:52:02 | 7.3961,94.2224 | 27.4  | 4.8 |
| 47 | 17-05-2019 | 18:29:24 | 7.5362,94.2358 | 10    | 4.5 |
| 48 | 17-05-2019 | 19:05:20 | 7.586,94.2535  | 16.3  | 4.8 |
| 49 | 19-06-2019 | 12:05:01 | 6.6871,93.4415 | 35    | 4.6 |
| 50 | 09-07-2019 | 09:26:13 | 8.6569,94.0188 | 80    | 4.5 |
| 51 | 09-07-2019 | 11:40:26 | 8.3982,93.7661 | 22    | 4.5 |
| 52 | 21-08-2019 | 09:19:11 | 8.9309,93.4665 | 10    | 4.8 |
| 53 | 17-11-2019 | 01:28:57 | 7.1332,94.4124 | 24.8  | 5.1 |
| 54 | 17-11-2019 | 06:47:06 | 7.1291,94.6991 | 10    | 4.5 |
| 55 | 20-11-2019 | 03:37:08 | 7.2687,94.5378 | 10    | 4.7 |
| 56 | 19-12-2019 | 19:01:52 | 5.1651,94.3996 | 43    | 4.5 |
| 57 | 24-12-2019 | 05:52:58 | 6.9983,92.3125 | 23    | 5   |
| 58 | 30-12-2019 | 16:59:04 | 6.6953,94.4063 | 103.8 | 5   |
| 59 | 06-01-2020 | 15:08:01 | 8.8571,93.5786 | 23    | 4.5 |
| 60 | 22-01-2020 | 19:23:26 | 7.6921,93.9163 | 100   | 4.6 |
| 61 | 28-01-2020 | 20:29:38 | 7.2879,92.0567 | 24    | 4.9 |



|    |            |          |                |    |     |
|----|------------|----------|----------------|----|-----|
| 62 | 19-03-2020 | 12:58:57 | 8.8682,93.8319 | 22 | 4.5 |
| 63 | 24-03-2020 | 15:00:31 | 7.8407,92.2031 | 10 | 4.5 |

**Table T2.** The relationships between the observed significant fractal dimensions and earthquake occurrence are as below:

| Earthquake characteristics |            |      |      |            |       |             | Anomaly characteristics                                 |                                                                     |          |
|----------------------------|------------|------|------|------------|-------|-------------|---------------------------------------------------------|---------------------------------------------------------------------|----------|
| EQ No.                     | Time of Eq | Mag. | fD   | Epi. Dist. | Fault |             | Eq detail                                               | Anomaly detail                                                      | Lead/lag |
| 49                         | 19-06-2019 | 4.6  | 35   | 60         | WAF   |             | Mod mag, mod fd, mod epidist                            | One small + one sig enhancement<br>12-13 Jun 2019<br>16-18 Jun 2019 | 7<br>3   |
| 50                         | 09-07-2019 | 4.5  | 80   | 185        | SS    | 2 diff loc  | Mod mag, Large fd, large epidist+ mod fd, large epidist | Two sig enhancements<br>20-25 Jun 2019<br>29 Jun-2 Jul 2019         | 19<br>10 |
| 51                         | 09-07-2019 | 4.5  | 22   | 156        | WAF   |             |                                                         |                                                                     |          |
| 52                         | 21-08-2019 | 4.8  | 10   | 219        | WAF   |             | Mod mag, v. shallow fd, v large epidist                 | No enhancements                                                     |          |
| 53                         | 17-11-2019 | 5.1  | 24.8 | 60         | SS    | Similar loc | Mod mag, shallow/v shallow fd, mod epidist              | One persistent enhancement<br>6-15 Nov 2019                         | 11       |
| 54                         | 17-11-2019 | 4.5  | 10   | 91         | SS    |             |                                                         |                                                                     |          |
| 55                         | 20-11-2019 | 4.7  | 10   | 78         | SS    |             |                                                         |                                                                     |          |
| 56                         | 19-12-2019 | 4.5  | 43   | 212        | WAF   |             | Mod mag, mod fd, v large epidist                        | One persistent enhancement<br>1-14 Dec 2019                         | 18       |

|    |            |     |       |     |     |            |                                             |                                              |                       |
|----|------------|-----|-------|-----|-----|------------|---------------------------------------------|----------------------------------------------|-----------------------|
| 57 | 24-12-2019 | 5   | 23    | 173 | AT  |            | Mod mag, mod fd, v large epidist            | Minor enhancement<br>18-23 Dec 2019          | 6                     |
| 58 | 30-12-2019 | 5   | 103.8 | 67  | SS  |            | Mod mag, v large fd, mod epidist            | Minor enhancement<br>27-31 Dec 2019          | 3 and co              |
| 59 | 06-01-2020 | 4.5 | 23    | 209 | WAF |            | Mod mag, mod fd, v large epidist            | No enhancements                              |                       |
| 60 | 22-01-2020 | 4.6 | 100   | 77  | WAF | 2 diff loc | Mod mag, v deep/mod fd, mod/v large epidist | One persistent enhancement<br>16-28 Jan 2020 | 6 and co<br>12 and co |
| 61 | 28-01-2020 | 4.9 | 24    | 204 | AT  |            |                                             |                                              |                       |
| 62 | 19-03-2020 | 4.5 | 22    | 207 | SS  | 2 diff loc | Mod mag, shallow fd, v large epidist        | No enhancements                              |                       |
| 63 | 24-03-2020 | 4.5 | 10    | 208 | AT  |            |                                             |                                              |                       |



|    |            |     |      |     |       |                                     |                                             |                                            |                                                      |                 |    |
|----|------------|-----|------|-----|-------|-------------------------------------|---------------------------------------------|--------------------------------------------|------------------------------------------------------|-----------------|----|
| 52 | 21-08-2019 | 4.8 | 10   | 219 | WAF   |                                     | Mod mag, v. shallow fd, v large epidist     | 18 Jul, 2019                               | No enhancement                                       | 17-19 Jul, 2019 | 32 |
| 53 | 17-11-2019 | 5.1 | 24.8 | 60  | SS    | Si<br>mil<br>ar<br>loc<br>ati<br>on | Mod mag, shallow/v shallow fd, mod epidist  | 9-15 Oct, 2019<br>7-9 Nov, 11-12 Nov, 2019 | 9-14 Oct, 2019<br>2-3 Nov, 7-10 Nov, 12-14 Nov, 2019 | No enhancement  | 36 |
| 54 | 17-11-2019 | 5.1 | 10   | 91  | SS    |                                     |                                             |                                            |                                                      |                 | 10 |
| 55 | 20-11-2019 | 4.7 | 10   | 78  | SS    |                                     |                                             |                                            |                                                      |                 | 6  |
| 56 | 19-12-2019 | 4.5 | 43   | 212 | WAF   |                                     | Mod mag, mod fd, v large epidist            | No enhancement                             |                                                      |                 | 7  |
| 57 | 24-12-2019 | 5   | 23   | 173 | AT    |                                     | Mod mag, mod fd, v large epidist            |                                            |                                                      |                 | 15 |
| 58 | 30-12-2019 | 5   | 103  | 67  | SS    |                                     | Mod mag, v large fd, mod epidist            |                                            |                                                      |                 | 10 |
| 59 | 06-01-2020 | 4.5 | 23   | 209 | WF    |                                     | Mod mag, mod fd, v large epidist            |                                            |                                                      |                 | 5  |
| 60 | 22-01-2020 | 4.6 | 100  | 77  | WAF   | 2<br>Dif<br>f.<br>loc<br>ati<br>on  | Mod mag, v deep/mod fd, mod/v large epidist | 18-20 Jan, 24-26 Jan, 2020                 | 16-20 Jan, 2020                                      | No enhancement  | 4  |
| 61 | 28-01-2020 | 4.9 | 24   | 204 | AT    |                                     |                                             |                                            |                                                      |                 | 4  |
| 62 | 19-03-2020 | 4.5 | 22   | 207 | SS,AT | 2<br>Dif<br>f<br>loc<br>ati<br>on   | Mod mag, shallow fd, v large epidist        | No enhancement                             | No enhancement                                       | No enhancement  | 6  |
| 63 | 24-03-2020 | 4.5 | 10   | 207 | AT    |                                     |                                             |                                            |                                                      |                 | 6  |
|    | NO events  |     |      |     |       |                                     |                                             | 10-14 Apr, 2020                            | 10-14 Apr, 2020                                      | 11-12 Apr, 2019 | NA |

**Table T4.** The relationships between the observed significant holder exponent parameter and earthquake occurrence are as below:

| Earthquake characteristics |                          |       |      |            |                 | Anomaly characteristics                 |                                                                               |                                              |                                              |                                              |                                   |
|----------------------------|--------------------------|-------|------|------------|-----------------|-----------------------------------------|-------------------------------------------------------------------------------|----------------------------------------------|----------------------------------------------|----------------------------------------------|-----------------------------------|
|                            | Time of Earthquake       | M ag. | fD.  | Epic. (km) |                 | fmax                                    | H (0)                                                                         | Hmax                                         | Hmin                                         | Lead\ time                                   | Lag                               |
| 1-45                       | 31-03-2019<br>18-04-2019 |       |      |            |                 |                                         | One persistence enhancement<br>2-18 Apr 2019                                  | One small enhancement<br>2-10 Apr 2019       | One small enhancement<br>2-10 Apr            | One small enhancement<br>2-10 Apr            | Co                                |
| 46                         | 16-05-2019               | 4.5   | 27.4 | 58         |                 | Mod mag, mod fd, mod epidist            | One significant and two small enhancements<br>7-14 May 2019<br>17-19 May 2019 | One significant enhancement<br>6-14 May 2019 | One significant enhancement<br>5-14 May 2019 | One significant enhancement<br>7-11 May 2019 | 9<br>Co and post<br>10<br>11<br>9 |
| 47                         | 17-05-2019               | 4.8   | 10   | 71         |                 |                                         |                                                                               |                                              |                                              |                                              |                                   |
| 48                         | 17-05-2019               | 4.8   | 16   | 71         |                 |                                         |                                                                               |                                              |                                              |                                              |                                   |
| 49                         | 19-06-2019               | 4.6   | 65   | 60         |                 | Mod mag, mod fd, mod epidist            | One small enhancement<br>20-21 May 2019                                       |                                              |                                              |                                              | 29                                |
| 50                         | 09-07-2019               | 4.5   | 80   | 185        | 2 Diff location | Mod mag, Large fd, large                | No enhancements                                                               |                                              |                                              |                                              |                                   |
| 51                         | 09-07-2019               | 4.5   | 22   | 156        |                 |                                         |                                                                               |                                              |                                              |                                              |                                   |
| 52                         | 21-08-2019               | 4.8   | 10   | 219        |                 | Mod mag, v. shallow fd, v large epidist | Two small enhancements<br>15-16 Jul 2019<br>6-Aug 2019                        |                                              |                                              | Two small enhancements                       | 35<br>15                          |

|    |            |     |      |     |                  |                                             |                                         |                                         |                                         | 6 Aug 2019                              |                                          |
|----|------------|-----|------|-----|------------------|---------------------------------------------|-----------------------------------------|-----------------------------------------|-----------------------------------------|-----------------------------------------|------------------------------------------|
| 53 | 17-11-2019 | 5.1 | 24.8 | 60  | Similar location | Mod mag, shallow/v shallow fd, mod epidist  | 1 small enhancement and one persistence | 50<br>28<br>17<br>1 & co<br>25<br>1 & co |
| 54 | 17-11-2019 | 5.1 | 10   | 91  |                  |                                             |                                         |                                         |                                         |                                         |                                          |
| 55 | 20-11-2019 | 4.7 | 10   | 78  |                  |                                             |                                         |                                         |                                         |                                         |                                          |
| 56 | 19-12-2019 | 4.5 | 43   | 212 |                  | Mod mag, mod fd, v large epidist            |                                         |                                         |                                         |                                         | No enhancement                           |
| 57 | 24-12-2019 | 5   | 23   | 173 |                  | Mod mag, mod fd, v large epidist            |                                         |                                         |                                         |                                         |                                          |
| 58 | 30-12-2019 | 5   | 103  | 67  |                  | Mod mag, v large fd, mod epidist            |                                         |                                         |                                         |                                         |                                          |
| 59 | 06-01-2020 | 4.5 | 23   | 209 |                  | Mod mag, mod fd, v large epidist            |                                         |                                         | One small enhancement                   | 3 & Co                                  | 19                                       |
| 60 | 22-01-2020 | 4.6 | 100  | 77  | 2 Diff location  | Mod mag, v deep/mod fd, mod/v large epidist |                                         |                                         |                                         |                                         | 25                                       |
| 61 | 28-01-2020 | 4.9 | 24   | 204 |                  |                                             |                                         |                                         |                                         |                                         |                                          |

|    |            |     |    |     |                 |                                      |  |  |                                |    |    |
|----|------------|-----|----|-----|-----------------|--------------------------------------|--|--|--------------------------------|----|----|
| 62 | 19-03-2020 | 4.5 | 22 | 207 | 2 Diff location | Mod mag, shallow fd, v large epidist |  |  | One small enhancement<br>4 Feb |    | 44 |
| 63 | 24-03-2020 | 4.5 | 10 | 207 |                 |                                      |  |  |                                | 47 |    |
